# Supplementary material for: Metagenomic analyses and genetic diversity of Tomato leaf curl Arusha virus affecting tomato plants in Kenya
Source: Virol J. 2021 Jan 6;18:2. doi: 10.1186/s12985-020-01466-z (PMC7789182; doi:10.1186/s12985-020-01466-z)
Supplement: Supplementary file 7 — Additional file 7. Table S4: Percentage amino acid sequence similarities between open reading frames of Tomato leaf curl Arusha virus-like isolates from Kenya with DNA-A component of tomato begomoviruses. [file 12985_2020_1466_MOESM7_ESM.xlsx]

## Sheet: Additional file 6 Table S4
	Additional file 6: Table S4.Percentage amino acid sequence similarities between open reading frames
	of Tomato leaf curl Arusha virus-like isolates from Kenya with DNA-A component of tomato begomoviruses
	Begomovirus	Genomic regions b
	species a	V1	V2	C1	C2	C3	C4
	ToLCArV	93.3-99.1	97.3-98.9	95.4-98.6	94.2-97.8	96.0-98.0	97.1-100.0
	ToLCCMV	74.5-76.3	86.6-87.8	81.9-85.4	64.3-68.6	66.2-68.2	69.2-73.1
	ToLCAnV	75.0-76.7	88.2-88.9	70.6-72.2	62.1-64.3	65.2-68.1	50.6-53.3
	ToLCBaV/A	63.0-64.7	73.9-74.3	75.3-76.9	58.5-60.0	63.0-65.2	52.9-56.5
	ToLCBV	67.7-68.6	78.1-79.3	75.7-77.6	57.0-59.3	65.2-68.8	50.0-52.9
	ToLCKMV	80.6-82.3	93.1-93.9	76.5-77.9	63.6-65.0	66.0-69.6	54.8-56.7
	ToLCDiV	66.3-67.2	81.7-82.9	80.1-81.7	64.7-66.9	71.9-74.8	72.5-73.5
	ToLCGV	74.8-76.5	86.2-87.4	78.2-80.1	64.7-68.4	67.5-69.6	56.7-58.6
	ToLCGdV	71.4-73.1	79.0-80.5	80.7-81.6	61.0-63.2	62.7-66.7	72.9-76.5
	ToLCHaiV	71.2-74.3	75.5-75.9	79.3-80.7	59.2-60.0	57.3-59.4	60.8-61.7
	ToLCHaV	72.2-73.9	79.0-80.1	76.4-77.8	56.3-58.5	63.0-64.5	46.1-50.9
	ToLCIRV	67.7-68.6	73.5-73.9	73.3-74.4	59.2-61.5	65.2-66.7	48.1-51.0
	ToLCJaV/A	67.7-69.5	78.2-79.4	81.8-82.9	56.6-58.8	65.9-66.7	70.6-73.5
	ToLCV-K3	67.7-68.6	76.2-77.4	75.1-76.8	62.9-64.4	65.2-66.7	58.6-62.1
	ToLCLV	55.0-56.7	81.2-82.4	77.4-78.6	56.6-59.5	62.0-65.2	59.6-62.5
	ToLCMGV/Men	82.5-84.2	88.5-90.0	77.7-78.5	67.1-69.3	66.2-68.8	57.6-61.2
	ToLCMiV	68.6-69.4	77.8-79.0	77.5-78.9	59.5-61.7	65.2-66.7	62.5-65.4
	ToLCMohV	79.8-84.0	91.6-92.4	-	65.4-66.9	66.0-69.6	37.5-38.5
	ToLCNaV	81.5-83.2	91.6-92.4	76.8-78.2	66.1-66.9	70.2-73.2	60.0-64.7
	ToLCNDC2	61.0-63.5	76.6-77.8	78.0-79.7	61.1-63.3	56.8-58.9	56.7-58.6
	ToLCNDC5	61.4-62.2	79.3-80.1	73.8-75.7	50.7-51.5	54.6-57.3	62.1-67.2
	ToLCJV	70.8-73.5	78.3-78.7	75.5-77.6	52.0-54.4	55.7-57.2	55.1-56.5
	ToLCKV2	56.7-57.6	77.8-78.5	77.6-78.7	62.2-63.7	64.5-66.7	49.0-51.9
	ToLCKV3	63.5-64.4	79.7-80.4	74.3-77.3	52.9-53.7	62.0-63.7	50.0-52.9
	ToLCNGV	73.9-75.6	87.4-88.5	78.6-80.7	67.6-69.1	67.5-68.9	62.7-63.7
	ToLCPalV	56.8-58.5	76.2-77.4	72.0-73.4	52.9-54.5	60.0-62.3	62.1-67.2
	ToLCPatV	70.3-74.5	79.4-80.1	76.6-77.7	59.5-61.7	56.7-60.9	56.3-59.7
	ToLCRaV	62.5-66.1	78.9-79.3	72.7-74.4	51.5-52.2	60.0-62.3	62.1-67.2
	ToLCSCV	81.7-84.2	90.8-91.2	71.3-73.0	65.6-68.5	63.1-66.7	35.0-39.0
	ToLCLKV	63.6-65.4	73.5-73.9	76.1-77.5	59.7-61.8	61.4-63.6	51.7-55.3
	ToLCTV/A	67.7-68.6	77.1-77.8	73.9-75.3	55.8-58.1	58.0-63.0	50.9-53.8
	ToLCTZV	82.5-84.1	96.2-97.3	88.2-89.8	93.6-95.0	95.3-98.5	78.8-79.8
	ToLCToV	68.3-70.9	82.8-84.0	88.6-90.3	93.6-95.0	91.3-94.2	85.3-88.2
	ToLCUV	79.8-81.5	93.1-93.5	72.6-74.6	65.0-66.4	67.5-69.6	31.7-33.6
	a ToLCArV: Tomato leaf curl virus Arusha virus, ToLCCMV: Tomato leaf curl Cameroon virus,
	ToLCAnV: Tomato leaf curl Anjouan virus, ToLCBaV/A: Tomato leaf curl Bangalore virus,
	ToLCBV: Tomato leaf curl Bangladesh virus, ToLCKMV: Tomato leaf curl Comoros virus,
	ToLCDiV: Tomato leaf curl Diana virus, ToLCGV: Tomato leaf curl Ghana virus,
	ToLCGdV: Tomato leaf curl Guangdong virus, ToLCHaiV: Tomato leaf curl Hainan virus,
	ToLCHaV: Tomato leaf curl Hanoi virus, ToLCIRV: Tomato leaf curl Iran virus,
	ToLCJaV/A: Tomato leaf curl Java virus, ToLCV-K3: Tomato leaf curl Kerala virus,
	TLCV-LA: Tomato leaf curl Laos virus, ToLCMGV: Tomato leaf curl Madagascar virus,
	ToLCMiV: Tomato leaf curl Mindanao virus, ToLCMohV: Tomato leaf curl Moheli virus,
	ToLCNaV: Tomato leaf curl Namakely virus, ToLCNDC2: Tomato leaf curl New Delhi virus 2,
	ToLCNDC5: Tomato leaf curl New Delhi virus 5, ToLCJV: Tomato leaf curl Joydebpur virus,
	ToLCKV2: Tomato leaf curl Karnataka virus 2, ToLCKV3: Tomato leaf curl Karnataka virus 3,
	ToLCNGV: Tomato leaf curl Nigeria virus, ToLCPalV: Tomato leaf curl Palampur virus,
	ToLCPatV: Tomato leaf curl Patna virus, ToLCRaV: Tomato leaf curl Rajasthan virus,
	ToLCSCV: Tomato leaf curl Seychelles virus, ToLCLKV: Tomato leaf curl Sri Lanka virus,
	ToLCTV/A: Tomato leaf curl Taiwan virus, ToLCTZV: Tomato leaf curl Arusha virus,
	ToLCToV: Tomato leaf curl Toliara virus, ToLCUV: Tomato leaf curl Uganda virus.
	b V1: Movement protein gene, V2: Coat protein gene, C1: Replication-associated protein gene,
	C2: Transcriptional activator protein gene, C3: Replication enhancer protein gene, C4: C4 protein gene
